# Supplementary material
Source: publisher figshare collection journal article supplement (https://sage.figshare.com/ndownloader/files/22011402)
Supplement: Supplementary file 1 [file 22011402]

**Appendix - Group composition of focus groups with demographic details**

| <b>Focus group number</b> | <b>Participant number</b> | <b>Sex</b> | <b>Age</b> | <b>Family status</b>      | <b>Socio-professional category</b> |
|---------------------------|---------------------------|------------|------------|---------------------------|------------------------------------|
| FG1                       | FG1P1                     | Man        | 55         | Married/in a relationship | Liberal profession                 |
| FG1                       | FG1P3                     | Man        | 69         | Married/in a relationship | Executive occupations              |
| FG1                       | FG1P4                     | Man        | 69         | Married/in a relationship | Retired                            |
| FG1                       | FG1P5                     | Woman      | 60         | Married/in a relationship | Unemployed                         |
| FG1                       | FG1P6                     | Man        | 54         | Single                    | Executive occupations              |
| FG1                       | FG1P7                     | Woman      | 65         | Single                    | Retired                            |
| FG2                       | FG2P2                     | Woman      | 68         | Married/in a relationship | Retired                            |
| FG2                       | FG2P3                     | Man        | 72         | Divorced/separated        | Retired                            |
| FG2                       | FG2P4                     | Woman      | 59         | Divorced/separated        | Liberal profession                 |
| FG2                       | FG2P5                     | Man        | 70         | Widowed                   | Retired                            |
| FG3                       | FG3P1                     | Woman      | 62         | Married/in a relationship | Retired                            |
| FG3                       | FG3P2                     | Woman      | 68         | Married/in a relationship | Retired                            |
| FG3                       | FG3P3                     | Woman      | 66         | Widowed                   | Retired                            |
| FG3                       | FG3P4                     | Woman      | 56         | Divorced/separated        | Liberal profession                 |
| FG3                       | FG3P5                     | Man        | 63         | Single                    | Retired                            |
| FG4                       | FG4P1                     | Woman      | 62         | Divorced/separated        | Liberal profession                 |
| FG4                       | FG4P2                     | Man        | 62         | Married/in a relationship | Retired                            |
| FG4                       | FG4P3                     | Woman      | 51         | Single                    | Unemployed                         |
| FG4                       | FG4P4                     | Man        | 58         | Married/in a relationship | Executive occupations              |
| FG5                       | FG5P1                     | Woman      | 60         | Married/in a relationship | Unemployed                         |
| FG5                       | FG5P3                     | Man        | 62         | Married/in a relationship | Retired                            |
| FG5                       | FG5P4                     | Man        | 51         | Married/in a relationship | Unemployed                         |
| FG5                       | FG5P5                     | Woman      | 54         | Married/in a relationship | Employed                           |
| FG5                       | FG5P6                     | Man        | 68         | Married/in a relationship | Retired                            |
| FG6                       | FG6P1                     | Woman      | 61         | Married/in a relationship | Intermediate occupations           |
| FG6                       | FG6P2                     | Woman      | 52         | Married/in a relationship | Employed                           |
| FG6                       | FG6P3                     | Woman      | 67         | Married/in a relationship | Retired                            |
| FG6                       | FG6P4                     | Man        | 64         | Married/in a relationship | Retired                            |
| FG6                       | FG6P5                     | Woman      | 58         | Divorced/separated        | Retired                            |
